# Supplementary material
Source: MDPI journal article supplement (https://www.mdpi.com/2075-5309/14/1/211)
Supplement: s1 [file s1]

Dear participant,

You have arrived at a new city and you are looking for a residential neighborhood. We will walk you through 11 streets in varying neighborhoods.

After walking through each street, you will be asked to rate a number of items about the environment on a 1-5 scale (1 is the lowest, 5 is the highest). Let's get started and good luck!

Please note: While completing the questionnaire, you will not be able to move back and forth between items to change your answers.

1. I feel **happy** when I walk along this street
2. I don't feel at **home** when I walk along this street
3. I feel **bored** when I walk along this street
4. I feel that this street is **very crowded**
5. This street feels like a **part of me** \*\*\*\*
6. This street feels very **well lit** (very bright)
7. When I walk along this street, I feel a strong sense of **belonging**
8. This street **reflects** the type of person I am
9. I feel **safe** in this street
10. I **like** this street
11. I can easily think about **personal matters** when I walk along this street
12. There are **unsafe** places along this street
13. I am **not satisfied** with this street
14. I would like to **move into** this neighborhood
15. I feel that this street is **very vibrant**
16. I **look forward to** walking along this street in the future
17. It feels **very spacious** when walking down this street
18. Compared to other environments, this street has many **advantages**
